# Supplementary material for: Micromechanics of temperature sensitive microgels: dip in the Poisson ratio near the LCST
Source: Royal Society of Chemistry journal article supplement (doi:10.1039/c3sm50917f), 2013-01-01
Supplement: c3sm50917f.pdf [file c3sm50917f.pdf]

## Supporting Information

# Micromechanics of temperature sensitive microgels: Dip in Poisson ratio near the LCST

*Panayiotis Voudouris<sup>a,b</sup> Paul van der Schoot,<sup>b,c</sup> and Hans M. Wyss<sup>a,b</sup>*

*a) Institute for Complex Molecular Systems*

*b) Group of Structure and Rheology of Complex Fluids, Department of Applied Physics*

*c) Group Theory of Polymers and Soft Matter, Department of Applied Physics,*

*Eindhoven University of Technology,*

*P.O. Box 513, 5600 MB Eindhoven, The Netherlands*

## Table of Contents

### Capillary micromechanics measurements

- |                                                                                                                        |     |
|------------------------------------------------------------------------------------------------------------------------|-----|
| 1. Capillary micromechanics measurements for pNIPAM particles of 1/36 crosslinker to monomer ratio                     | S-2 |
| 2. Capillary micromechanics compressive modulus measurements for pNIPAM particles of 1/36 crosslinker to monomer ratio | S-3 |
| 3. Capillary micromechanics shear modulus measurements for pNIPAM particles of 1/36 crosslinker to monomer ratio       | S-4 |
| 4. Capillary micromechanics measurements for pNIPAM particles of 1/14 crosslinker to monomer ratio                     | S-5 |
| 5. Capillary micromechanics compressive modulus measurements for pNIPAM particles of 1/14 crosslinker to monomer ratio | S-6 |
| 6. Capillary micromechanics shear modulus measurements for pNIPAM particles of 1/14 crosslinker to monomer ratio       | S-7 |

| T(°C) | # Measurements | # Particles | K (Pa) | ±Kerror | G (Pa) | ±G error | Poisson Ratio |
|-------|----------------|-------------|--------|---------|--------|----------|---------------|
| 22.5  | 3              | 1           | 10400  | 1048    | 1700   | 155      | 0.42          |
| 25    | 7              | 1           | 11400  | 1168    | 2100   | 215      | 0.41          |
| 27    | 3              | 1           | 10400  | 1048    | 3500   | 325      | 0.35          |
| 28    | 3              | 1           | 15400  | 948     | 4000   | 400      | 0.38          |
| 29    | 3              | 1           | 12340  | 1980.8  | 3700   | 255      | 0.36          |
| 30    | 5              | 2           | 11400  | 1368    | 3542   | 331      | 0.36          |
| 31    | 6              | 2           | 9400   | 1128    | 3920   | 788      | 0.32          |
| 32    | 6              | 2           | 23400  | 2808    | 5850   | 1077     | 0.38          |
| 32.2  | 6              | 2           | 15400  | 2848    | 5850   | 877      | 0.31          |
| 32.4  | 7              | 3           | 9400   | 2128    | 5000   | 750      | 0.27          |
| 32.8  | 3              | 1           | 9400   | 2128    | 6000   | 900      | 0.24          |
| 32.9  | 6              | 2           | 8400   | 1508    | 6200   | 930      | 0.20          |
| 33    | 3              | 1           | 7100   | 1052    | 6000   | 900      | 0.17          |
| 33.1  | 6              | 2           | 7500   | 900     | 6100   | 1915     | 0.18          |
| 33.2  | 7              | 3           | 7000   | 1340    | 6100   | 1915     | 0.16          |
| 33.5  | 2              | 1           | 11000  | 1720    | 6500   | 1975     | 0.25          |
| 33.6  | 1              | 1           | 11300  | 1656    | 6500   | 1975     | 0.26          |
| 33.7  | 3              | 1           | 16000  | 2220    | 12000  | 1200     | 0.20          |
| 33.8  | 3              | 1           | 17500  | 3100    | 9000   | 1850     | 0.28          |
| 34    | 7              | 3           | 23500  | 2820    | 12000  | 1800     | 0.28          |
| 34    | 3              | 1           | 33500  | 4020    | 21700  | 3255     | 0.23          |
| 34.5  | 3              | 1           | 50000  | 6000    | 15700  | 1355     | 0.36          |
| 35    | 3              | 1           | 65000  | 7800    | 13000  | 1250     | 0.40          |
| 36    | 3              | 1           | 60000  | 7200    | 13000  | 1550     | 0.40          |

| T (°C) | #1    | #2    | #3    | #4    | #5    | #6    | #7    | <K><br>(Pa) | ±Kerror |
|--------|-------|-------|-------|-------|-------|-------|-------|-------------|---------|
| 22.5   | 9100  | 11500 | 10550 |       |       |       |       | 10400       | 1048    |
| 25     | 13450 | 12450 | 15400 | 9200  | 9150  | 8150  | 11700 | 11400       | 1168    |
| 27     | 8950  | 10500 | 11850 |       |       |       |       | 10400       | 1048    |
| 28     | 14000 | 14550 | 17550 |       |       |       |       | 15400       | 948     |
| 29     | 12850 | 12550 | 11500 |       |       |       |       | 12340       | 1980.8  |
| 30     | 12050 | 10050 | 12000 |       |       |       |       | 11400       | 1368    |
| 31     | 8050  | 9300  | 9600  | 10750 | 8450  | 10500 |       | 9400        | 1128    |
| 32     | 20050 | 25050 | 22050 | 29100 | 20050 | 24050 |       | 23400       | 2808    |
| 32.2   | 17500 | 11750 | 13450 | 20050 | 18350 | 11050 |       | 15400       | 2848    |
| 32.4   | 12500 | 7850  | 9500  | 9700  | 9650  | 7450  | 9400  | 9400        | 2128    |
| 32.8   | 7850  | 9200  | 11050 |       |       |       |       | 9400        | 2128    |
| 32.9   | 7100  | 7350  | 9950  | 9100  | 8550  | 8400  |       | 8400        | 1508    |
| 33     | 5950  | 7150  | 8250  |       |       |       |       | 7100        | 1052    |
| 33.1   | 6400  | 8550  | 7900  | 8350  | 7500  | 6550  |       | 7500        | 900     |
| 33.2   | 6000  | 5550  | 7550  | 8150  | 8450  | 6450  |       | 7000        | 1340    |

| T (°C) | #1    | #2    | #3    | #4    | #5    | #6    | #7   | G (Pa) | ±G error |
|--------|-------|-------|-------|-------|-------|-------|------|--------|----------|
| 22.5   | 1550  | 1680  | 1864  |       |       |       |      | 1700   | 155      |
| 25     | 1850  | 2100  | 1800  | 1750  | 2350  | 2250  | 2350 | 2100   | 215      |
| 27     | 2950  | 3700  | 3750  |       |       |       |      | 3500   | 325      |
| 28     | 3550  | 4050  | 4350  |       |       |       |      | 4000   | 400      |
| 29     | 3400  | 3750  | 4000  |       |       |       |      | 3700   | 255      |
| 30     | 3150  | 3650  | 3600  | 3700  | 3400  |       |      | 3542   | 331      |
| 31     | 3100  | 3360  | 4100  | 4150  | 4250  | 4900  |      | 3920   | 788      |
| 32     | 4350  | 5450  | 6300  | 6450  | 6350  | 5950  |      | 5850   | 1077     |
| 32.2   | 4500  | 5500  | 6050  | 6100  | 6500  | 6400  |      | 5850   | 877      |
| 32.4   | 4800  | 4200  | 5050  | 5900  | 5550  | 4650  |      | 5000   | 750      |
| 32.8   | 5150  | 6400  | 6350  |       |       |       |      | 6000   | 900      |
| 32.9   | 5800  | 5150  | 6650  | 6750  | 6250  | 6480  |      | 6200   | 930      |
| 33     | 5250  | 5950  | 6600  |       |       |       |      | 6000   | 900      |
| 33.1   | 4150  | 5350  | 6100  | 6750  | 6850  | 7250  |      | 6100   | 1915     |
| 33.2   | 4350  | 5850  | 6500  | 6900  | 6100  | 6400  |      | 6100   | 1915     |
| 33.5   | 7500  | 5500  |       |       |       |       |      | 6500   | 1975     |
| 33.6   | 6500  |       |       |       |       |       |      | 6500   | 1975     |
| 33.7   | 13000 | 11500 | 11500 |       |       |       |      | 12000  | 1200     |
| 33.8   | 6500  | 9550  | 10850 |       |       |       |      | 9000   | 1850     |
| 34     | 9550  | 11550 | 13550 | 14000 | 15500 | 10500 | 9450 | 12000  | 1800     |
| 34     | 17550 | 25500 | 22000 |       |       |       |      | 21700  | 3255     |

| T (°C) | # Measurements | # Particles | K (Pa) | ±K error | G (Pa) | ±G error | Poissons ratio |
|--------|----------------|-------------|--------|----------|--------|----------|----------------|
| 22.5   | 3              | 1           | 14400  | 1240.8   | 1800   | 270      | 0.44           |
| 25     | 8              | 2           | 14400  | 1248     | 3000   | 450      | 0.40           |
| 27     | 4              | 1           | 12400  | 1488     | 2500   | 375      | 0.40           |
| 28     | 3              | 1           | 12400  | 1428     | 2500   | 375      | 0.40           |
| 29     | 4              | 1           | 10340  | 2368     | 3000   | 450      | 0.36           |
| 30     | 4              | 1           | 10400  | 1888     | 3542   | 531.3    | 0.35           |
| 31     | 4              | 1           | 12400  | 1268     | 2920   | 438      | 0.39           |
| 32     | 6              | 2           | 11900  | 1648     | 4850   | 727.5    | 0.38           |
| 32.2   | 7              | 2           | 11400  | 1112     | 2850   | 927.5    | 0.38           |
| 32.4   | 7              | 2           | 7400   | 660      | 2500   | 1075     | 0.35           |
| 32.8   | 5              | 2           | 6400   | 948      | 2800   | 820      | 0.31           |
| 32.9   | 7              | 2           | 5400   | 900      | 3200   | 980      | 0.25           |
| 33     | 4              | 2           | 5100   | 516      | 3200   | 880      | 0.24           |
| 33.1   | 6              | 2           | 5500   | 1260     | 3100   | 765      | 0.26           |
| 33.2   | 7              | 2           | 5400   | 2100     | 3600   | 1240     | 0.23           |
| 33.5   | 4              | 2           | 5000   | 2400     | 3500   | 1025     | 0.21           |
| 33.6   | 4              | 2           | 4300   | 4200     | 3500   | 925      | 0.18           |
| 33.7   | 4              | 2           | 5500   | 4260     | 5000   | 1250     | 0.15           |
| 33.8   | 4              | 2           | 17500  | 4900     | 5000   | 950      | 0.37           |
| 33.9   | 8              | 3           | 20000  | 7000     | 5000   | 350      | 0.38           |
| 34     | 4              | 2           | 27500  | 7320     | 6000   | 1200     | 0.40           |
| 34     | 4              | 2           | 35500  | 8760     | 7007   | 1051.05  | 0.40           |
| 34.2   | 7              | 2           | 40000  | 12000    | 10100  | 1515     | 0.38           |
| 34.5   | 5              | 1           | 50000  | 1240.8   | 11700  | 1755     | 0.39           |
| 34.6   | 4              | 1           | 61000  | 1248     | 12000  | 1800     | 0.40           |
| 35     | 4              | 1           | 73000  | 1488     | 13000  | 1950     | 0.42           |
| 36     | 4              | 1           | 75000  | 1428     | 13000  | 1950     | 0.42           |

| T(°C) | #1    | #2    | #3    | #4    | #5    | #6    | #7    | #8    | K (Pa) | ±K error |
|-------|-------|-------|-------|-------|-------|-------|-------|-------|--------|----------|
| 22.5  | 12500 | 16050 | 14550 |       |       |       |       |       | 14400  | 1240.8   |
| 25    | 11500 | 17100 | 13600 | 12500 | 15500 | 18550 | 12350 | 14000 | 14400  | 1248     |
| 27    | 14100 | 12500 | 12850 | 10300 |       |       |       |       | 12400  | 1488     |
| 28    | 12200 | 11050 | 13950 |       |       |       |       |       | 12400  | 1428     |
| 29    | 8500  | 11150 | 12400 | 9400  |       |       |       |       | 10340  | 2368     |
| 30    | 10400 | 7850  | 13500 | 9650  |       |       |       |       | 10400  | 1888     |
| 31    | 10950 | 11650 | 12900 | 13950 |       |       |       |       | 12400  | 1268     |
| 32    | 12100 | 9900  | 14050 | 11900 | 12100 | 11600 |       |       | 11900  | 1648     |
| 32.2  | 12500 | 10100 | 9500  | 11900 | 12900 | 11700 | 11400 |       | 11400  | 1112     |
| 32.4  | 6800  | 6500  | 8200  | 7500  | 8450  | 7000  | 7500  |       | 7400   | 660      |
| 32.8  | 6700  | 5200  | 7100  | 6750  | 6100  |       |       |       | 6400   | 948      |
| 32.9  | 4500  | 5150  | 6650  | 5650  | 6050  | 5250  | 4800  |       | 5400   | 900      |
| 33    | 4000  | 5500  | 6600  | 4450  |       |       |       |       | 5100   | 516      |
| 33.1  | 4150  | 5350  | 6100  | 6750  | 6550  | 4250  |       |       | 5500   | 1260     |
| 33.2  | 4350  | 5850  | 6500  | 5700  | 5050  | 6100  | 4500  |       | 5400   | 2100     |
| 33.5  | 7100  | 4500  | 4250  | 4100  |       |       |       |       | 5000   | 2400     |
| 33.6  | 4300  | 3300  | 6700  | 3000  |       |       |       |       | 4300   | 4200     |
| 33.7  | 2500  | 5500  | 7000  | 7150  |       |       |       |       | 5500   | 4260     |
| 33.8  | 19250 | 12500 | 17900 | 20550 |       |       |       |       | 17500  | 4900     |
| 33.9  | 17500 | 16500 | 23500 | 24500 | 24000 | 18150 | 17500 | 18500 | 20000  | 7000     |
| 34    | 25150 | 28000 | 29100 | 27900 |       |       |       |       | 27500  | 7320     |
| 34    | 37500 | 34500 | 30100 | 40050 |       |       |       |       | 35500  | 8760     |
| 34.2  | 41000 | 43000 | 47000 | 38000 | 37650 | 33600 | 39600 |       | 40000  | 12000    |
| 34.5  | 51850 | 55000 | 47500 | 42300 | 55200 | 48400 |       |       | 50000  | 1240.8   |
| 34.6  | 55500 | 57100 | 64500 | 67000 |       |       |       |       | 61000  | 1248     |
| 35    | 75750 | 71300 | 68500 | 76500 |       |       |       |       | 73000  | 1488     |
| 36    | 69500 | 78000 | 76350 | 69505 | 77000 | 78500 | 76000 |       | 75000  | 1428     |

|      |       |       |       |       |       |      |      |      |       |        |
|------|-------|-------|-------|-------|-------|------|------|------|-------|--------|
| 33.6 | 2800  | 3100  | 3650  | 3350  |       |      |      |      | 4300  | 4200   |
| 33.7 | 3800  | 4750  | 5600  | 5750  |       |      |      |      | 5500  | 4260   |
| 33.8 | 5200  | 5000  | 4100  | 5550  |       |      |      |      | 17500 | 4900   |
| 33.9 | 4100  | 5050  | 5400  | 4750  | 5450  | 4850 | 5350 | 5050 | 20000 | 7000   |
| 34   | 4500  | 6500  | 6050  | 7100  |       |      |      |      | 27500 | 7320   |
| 34   | 7350  | 6100  | 6650  | 7750  |       |      |      |      | 35500 | 8760   |
| 34.2 | 7500  | 15300 | 10500 | 9500  | 10500 | 8500 | 9050 |      | 40000 | 12000  |
| 34.5 | 9350  | 9650  | 10300 | 15500 | 13550 |      |      |      | 50000 | 1240.8 |
| 34.6 | 10500 | 11000 | 12000 | 14500 |       |      |      |      | 61000 | 1248   |
| 35   | 10900 | 15800 | 15200 | 10100 |       |      |      |      | 73000 | 1488   |
| 36   | 10200 | 13000 | 14100 | 14550 |       |      |      |      | 75000 | 1428   |

| T (°C) | #1    | #2    | #3    | #4    | #5    | #6   | #7   | #8   | G (Pa) | ±G error |
|--------|-------|-------|-------|-------|-------|------|------|------|--------|----------|
| 22.5   | 1550  | 2050  | 1880  |       |       |      |      |      | 14400  | 1240.8   |
| 25     | 2500  | 3500  | 3000  | 2450  | 3350  | 3400 | 3150 | 2950 | 14400  | 1248     |
| 27     | 2100  | 2600  | 2650  | 2550  |       |      |      |      | 12400  | 1488     |
| 28     | 2700  | 2100  | 2600  |       |       |      |      |      | 12400  | 1428     |
| 29     | 3500  | 3100  | 2700  | 2800  |       |      |      |      | 10340  | 2368     |
| 30     | 3500  | 3100  | 3850  | 3650  |       |      |      |      | 10400  | 1888     |
| 31     | 3000  | 3350  | 2500  | 2900  |       |      |      |      | 12400  | 1268     |
| 32     | 4500  | 4100  | 5000  | 5300  | 5200  | 4900 |      |      | 11900  | 1648     |
| 32.2   | 3200  | 3500  | 2600  | 2550  | 2450  | 3000 | 2900 |      | 11400  | 1112     |
| 32.4   | 2300  | 2150  | 3100  | 2800  | 2400  | 2350 | 2100 |      | 7400   | 660      |
| 32.8   | 2300  | 2500  | 3200  | 2950  | 2950  |      |      |      | 6400   | 948      |
| 32.9   | 3650  | 2700  | 2450  | 3400  | 3600  |      |      |      | 5400   | 900      |
| 33     | 2900  | 2750  | 3600  | 3600  |       |      |      |      | 5100   | 516      |
| 33.1   | 3000  | 3100  | 2800  | 2500  | 3900  | 3400 |      |      | 5500   | 1260     |
| 33.2   | 2750  | 3200  | 3300  | 3900  | 4100  | 4150 |      |      | 5400   | 2100     |
| 33.5   | 3900  | 3500  | 2900  | 3600  |       |      |      |      | 5000   | 2400     |
| 33.6   | 2800  | 4100  | 3650  | 3350  |       |      |      |      | 4300   | 4200     |
| 33.7   | 3800  | 4750  | 5600  | 5750  |       |      |      |      | 5500   | 4260     |
| 33.8   | 5200  | 5000  | 4100  | 5550  |       |      |      |      | 17500  | 4900     |
| 33.9   | 4100  | 5050  | 5400  | 4750  | 5450  | 4850 | 5350 | 5050 | 20000  | 7000     |
| 34     | 4500  | 6500  | 6050  | 7100  |       |      |      |      | 27500  | 7320     |
| 34     | 7350  | 6100  | 6650  | 7750  |       |      |      |      | 35500  | 8760     |
| 34.2   | 7500  | 15300 | 10500 | 9500  | 10500 | 8500 | 9050 |      | 40000  | 12000    |
| 34.5   | 9350  | 9650  | 10300 | 15500 | 13550 |      |      |      | 50000  | 1240.8   |
| 34.6   | 10500 | 11000 | 12000 | 14500 |       |      |      |      | 61000  | 1248     |
| 35     | 10900 | 15800 | 15200 | 10100 |       |      |      |      | 73000  | 1488     |
| 36     | 10200 | 13000 | 14100 | 14550 |       |      |      |      | 75000  | 1428     |
